# Supplementary material
Source: PubMed Central journal article supplement (PMC7196636)
Supplement: supp_RA119.012420_157880_2_supp_494460_q7cjyd.pdf [file supp_RA119.012420_157880_2_supp_494460_q7cjyd.pdf]

Respiratory deficiency caused by mutations in the coenzyme Q chaperone protein Coq10 is mitigated by deletion of *COQ11*

**Michelle C. Bradley, Krista Yang<sup>1</sup>, Lucía Fernández-del-Río<sup>1</sup>, Jennifer Ngo<sup>1,2</sup>, Anita Ayer<sup>3,4</sup>, Hui S. Tsui<sup>1</sup>, Noelle Alexa Novales<sup>1</sup>, Roland Stocker<sup>3,4</sup>, Orian S. Shirihai<sup>2</sup>, Mario H. Barros<sup>5</sup>, Catherine F. Clarke<sup>1\*</sup>**

**Contents of Supporting Information**

**Tables S1 and S2**

**Figures S1, S2, and S3**

**References**

**SUPPORTING INFORMATION**

**Table S1. Description and source of antibodies.**

| <i>Antibody</i>  | <i>Working dilution</i>  | <i>Source</i>                   |
|------------------|--------------------------|---------------------------------|
| Coq1             | 1:10,000                 | (1)                             |
| Coq2             | 1:1,000                  | (2)                             |
| Coq3             | 1:200                    | (3)                             |
| Coq4             | 1:2,000                  | (4)                             |
| Coq5             | 1:5,000                  | (5)                             |
| Coq6             | 1:200                    | (6)                             |
| Coq7             | 1:1,000                  | (7)                             |
| Coq8             | Affinity purified, 1:30  | (2)                             |
| Coq9             | 1:1,000                  | (2)                             |
| Coq10            | Affinity purified, 1:400 | (8)                             |
| Coq11            | 1:500                    | (8)                             |
| Mdh1             | 1:10,000                 | Lee McAlister-Henn <sup>b</sup> |
| Atp2             | 1:1,000                  | Carla M. Koehler <sup>c</sup>   |
| Cyt <sub>1</sub> | 1:1,000                  | Carla M. Koehler <sup>c</sup>   |
| Cyb <sub>2</sub> | 1:1,000                  | Carla M. Koehler <sup>c</sup>   |
| Hsp60            | 1:5,000                  | Carla M. Koehler <sup>c</sup>   |
| Porin            | 1:5,000                  | Carla M. Koehler <sup>c</sup>   |

<sup>b</sup>Dr. Lee McAlister-Henn, Department of Molecular Biophysics and Biochemistry, University of Texas Health Sciences Center, San Antonio, TX

<sup>c</sup>Dr. Carla M. Koehler, Department of Chemistry and Biochemistry, University of California, Los Angeles, Los Angeles, CA

**Table S2. Quantitative real-time PCR primers.**

| <b>Gene</b>  | <b>Forward primer (5'-3')</b> | <b>Reverse primer (5'-3')</b> |
|--------------|-------------------------------|-------------------------------|
| <i>COQ1</i>  | CCCGAAGTCGTAGAACTAATG         | GGAACCGGAAGTAGCTTATG          |
| <i>COQ2</i>  | CAGCTGGTATGTTGGGTATTT         | GACGGACCTGATAACTCTTTG         |
| <i>COQ3</i>  | CATGCTGGAGGGAAAGATAAA         | TCGACCAACAATGCCTTAAA          |
| <i>COQ4</i>  | GTGGTATCCTTGCACCTTTAC         | CCAGCATTTCTCCCAATAC           |
| <i>COQ5</i>  | TGCTTAAAGAAGGTGAGAAGAG        | TACCGAAGGAGACTGTGTAG          |
| <i>COQ6</i>  | TGAAGGACGAGTCGGATATT          | CCAACAAGGGCAACTCTATC          |
| <i>COQ7</i>  | GCTCCCAAGTGTCAGAATTTA         | CTGGTCCCATATGTGCTTTAG         |
| <i>COQ8</i>  | CGTATGGAGGGAACTGAAATAA        | GAGGCACCGAAATCCAATAA          |
| <i>COQ9</i>  | CGCTGTCATGGAAGCTGATAAA        | GAGAAAGGCGCTTGAATAG           |
| <i>COQ10</i> | GCGGTACCAATCACACTATTA         | GAGAGGCTTGTTATCCACAG          |
| <i>COQ11</i> | GCAGAGATATTTTCAGGCCTATTA      | CTGCTGAGTGGATACTGTTG          |
| <i>ACT1</i>  | TATGTTCTAGCGCTTGCACCA         | CCAAAGCAGCAACCTCTAAA          |

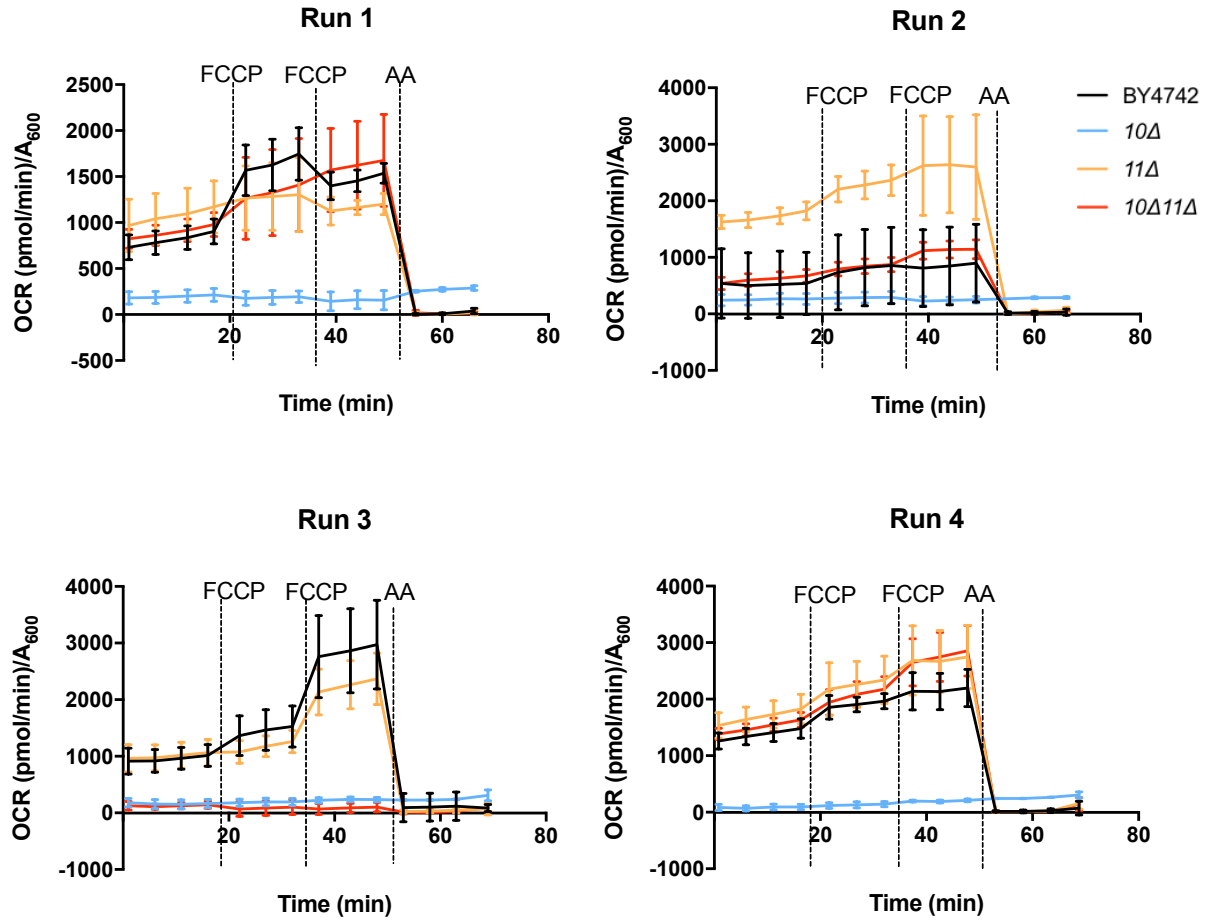

**Figure S1.** Oxygen consumption rates (OCRs) of yeast strains were determined with the XF96 Extracellular Flux Analyzer. The graphs depict traces from four independent experiments (Run 1 – Run 4). FCCP and Antimycin A (AA) were sequentially added to evaluate mitochondrial respiratory states. Each graph represents an individual experiment from the representative average traces (Fig. 2B), and each group represents 8–10 technical replicates.

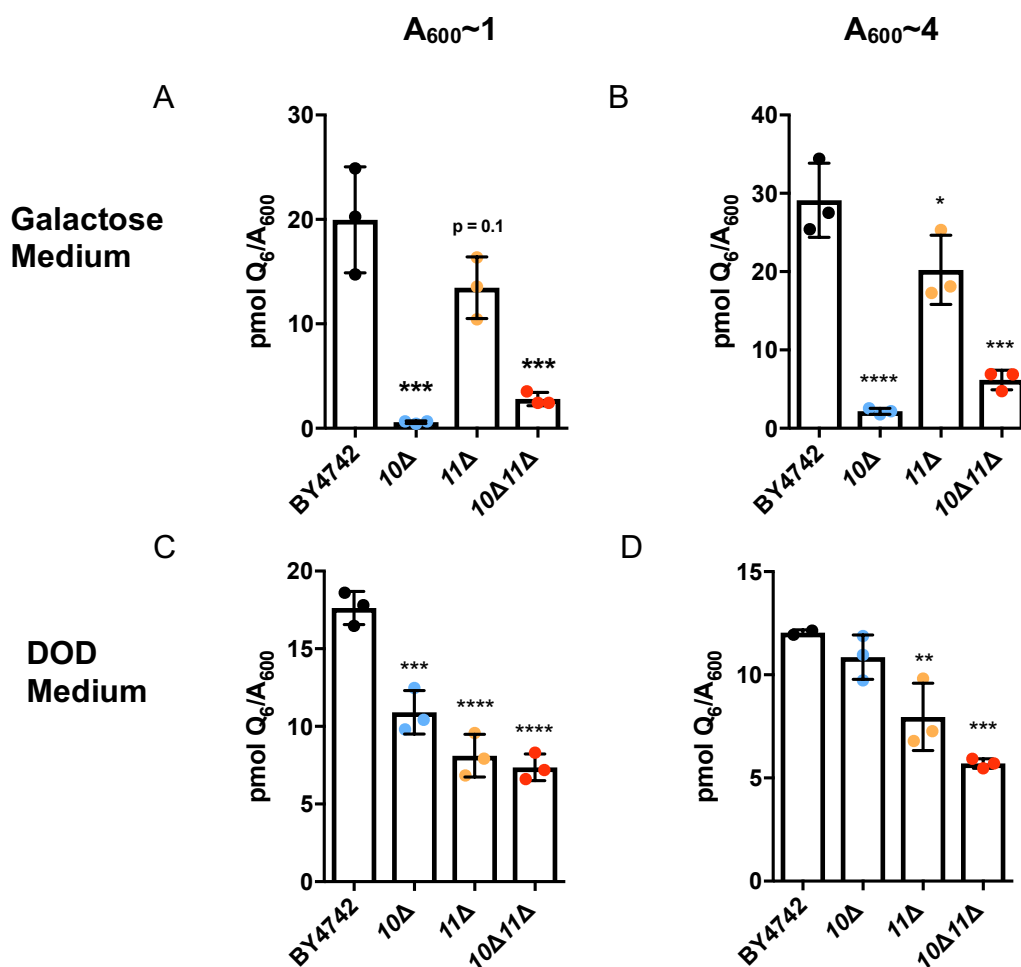

**Figure S2.** Q<sub>6</sub> content of whole cells have similar trends based on type of growth medium, rather than A<sub>600</sub> at time of harvest. Triplicates of 30 mL yeast cultures of wild type, *coq10*Δ, *coq11*Δ, and *coq10*Δ*coq11*Δ were grown in *A-B*, YPGal or *C-D*, dextrose-containing synthetic, minimal-medium (DOD) until they reached *A,C*, A<sub>600</sub>~1 or *B,D*, A<sub>600</sub>~4. Lipids from 10 mL of each culture were analyzed by LC-MS/MS. The data show mean ± SD, and the statistical significance as compared to wild type is represented by \*p < 0.05, \*\*p < 0.01, \*\*\*p < 0.001 and \*\*\*\*p < 0.0001. Panel B is a re-print from Fig. 5A in the main text.

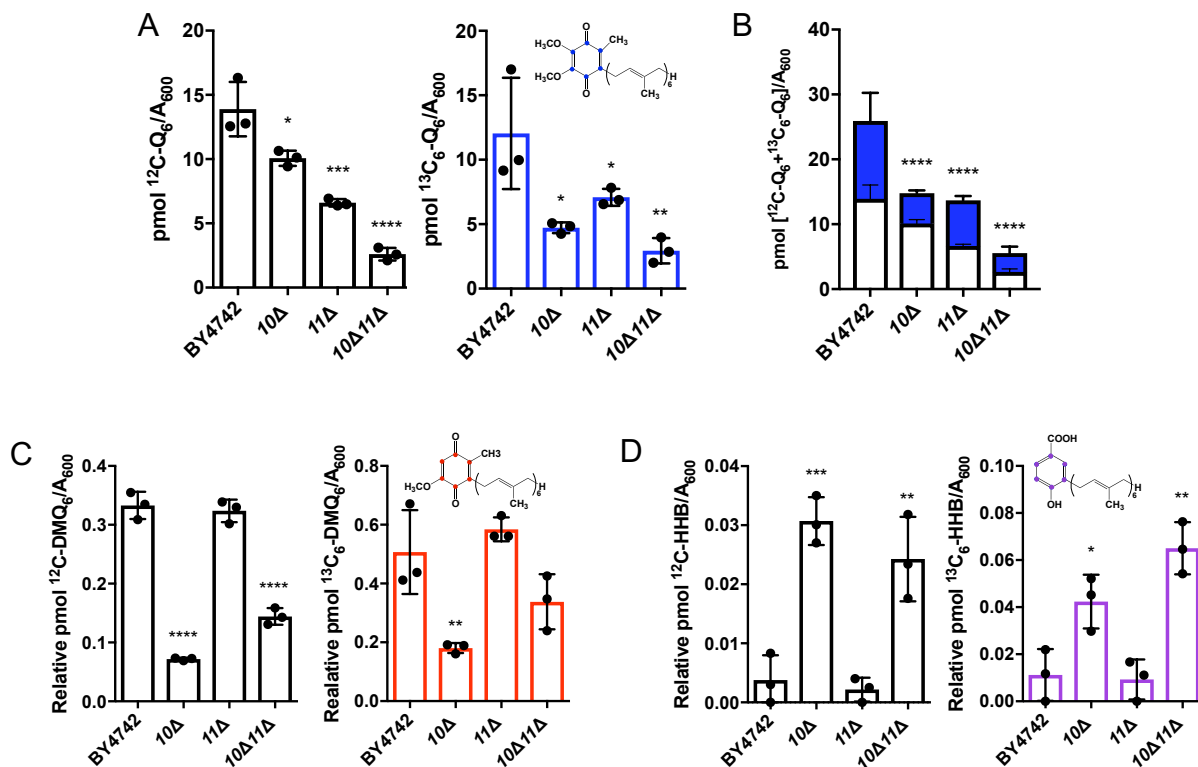

**Figure S3.** The *coq10Δcoq11Δ* double mutant the lowest total  $\text{Q}_6$  compared to the single mutants and wild type in minimal medium. Triplicates of 6 mL cultures in DOD minimal medium were labeled with 5  $\mu\text{g/mL}$   $^{13}\text{C}_6\text{-4HB}$ . After 4 h, lipid extracts from 5 mL of each were analyzed by LC-MS/MS. *A*, Amount of  $^{12}\text{C}_6\text{-Q}_6$  and  $^{13}\text{C}_6\text{-Q}_6$  (blue); *B*, Total amount of  $\text{Q}_6$ , from the sum of  $^{13}\text{C}_6\text{-Q}_6$  and  $^{12}\text{C}_6\text{-Q}_6$ ; *C*,  $^{12}\text{C}_6\text{-DMQ}_6$  and  $^{13}\text{C}_6\text{-DMQ}_6$  (red); and *D*,  $^{12}\text{C}_6\text{-HHB}$  and  $^{13}\text{C}_6\text{-HHB}$  (purple), were measured from the whole cell lipid extracts of wild type, *coq10Δ*, *coq11Δ*, and *coq10Δcoq11Δ* mutants. The data show mean  $\pm$  SD, and the statistical significance as compared to wild type is represented by \* $p < 0.05$ , \*\* $p < 0.01$ , \*\*\* $p < 0.001$  and \*\*\*\* $p < 0.0001$ .

**SUPPORTING REFERENCES**

1. Gin, P., and Clarke, C. F. (2005) Genetic evidence for a multi-subunit complex in coenzyme Q biosynthesis in yeast and the role of the Coq1 hexaprenyl diphosphate synthase. *J Biol Chem* **280**, 2676-2681
2. Hsieh, E. J., Gin, P., Gulmezian, M., Tran, U. C., Saiki, R., Marbois, B. N., and Clarke, C. F. (2007) *Saccharomyces cerevisiae* Coq9 polypeptide is a subunit of the mitochondrial coenzyme Q biosynthetic complex. *Arch Biochem Biophys* **463**, 19-26
3. Poon, W. W., Barkovich, R. J., Hsu, A. Y., Frankel, A., Lee, P. T., Shepherd, J. N., Myles, D. C., and Clarke, C. F. (1999) Yeast and rat Coq3 and *Escherichia coli* UbiG polypeptides catalyze both O-methyltransferase steps in coenzyme Q biosynthesis. *J Biol Chem* **274**, 21665-21672
4. Belogradov, G. I., Lee, P. T., Jonassen, T., Hsu, A. Y., Gin, P., and Clarke, C. F. (2001) Yeast *COQ4* encodes a mitochondrial protein required for coenzyme Q synthesis. *Arch Biochem Biophys* **392**, 48-58
5. Baba, S. W., Belogradov, G. I., Lee, J. C., Lee, P. T., Strahan, J., Shepherd, J. N., and Clarke, C. F. (2004) Yeast Coq5 C-methyltransferase is required for stability of other polypeptides involved in coenzyme Q biosynthesis. *J Biol Chem* **279**, 10052-10059
6. Gin, P., Hsu, A. Y., Rothman, S. C., Jonassen, T., Lee, P. T., Tzagoloff, A., and Clarke, C. F. (2003) The *Saccharomyces cerevisiae* *COQ6* gene encodes a mitochondrial flavin-dependent monooxygenase required for coenzyme Q biosynthesis. *J Biol Chem* **278**, 25308-25316
7. Tran, U. C., Marbois, B., Gin, P., Gulmezian, M., Jonassen, T., and Clarke, C. F. (2006) Complementation of *Saccharomyces cerevisiae* *coq7* mutants by mitochondrial targeting of the *Escherichia coli* UbiF polypeptide: two functions of yeast Coq7 polypeptide in coenzyme Q biosynthesis. *J Biol Chem* **281**, 16401-16409
8. Tsui, H. S., Pham, N. V. B., Amer, B. R., Bradley, M. C., Gosschalk, J. E., Gallagher-Jones, M., Ibarra, H., Clubb, R. T., Blaby-Haas, C. E., and Clarke, C. F. (2019) Human COQ10A and COQ10B are distinct lipid-binding START domain proteins required for coenzyme Q function. *J Lipid Res* **60**, 1293-1310
